1     **Distribution and diversity of fish species exposed to artisanal fishery along**  
2                                   **the Sudanese Red Sea coast.**

3  
4  
5     **By:** Erik Olsen<sup>1\*</sup>, Bjørn Erik Axelsen<sup>1</sup>, Even Moland<sup>1,2</sup>, Anne Christine Utne-Palm<sup>1</sup>,  
6     Elamin Mohammed Elamin<sup>3</sup>, Motassim Ali Mukhtar<sup>3</sup>, Adel Mohamed Saleh<sup>4</sup>,  
7     Sheikheldin Mohamed Elamin<sup>4</sup>, Mohamed Abdelhameed Iragi<sup>5</sup>, Said Gumaa Fadul  
8     Gumaa<sup>5</sup>

9  
10  
11  
12    **Affiliations:**

- 13        1) Institute of Marine Research, P.O. Box 1870 Nordnes, N-5817 Bergen,  
14        Norway
- 15        2) Department of Natural Sciences, University of Agder, P.O. Box 422, N-4604  
16        Kristiansand, Norway
- 17        3) Red Sea Fisheries Research Station, P.O. Box 730, Port Sudan, Red Sea State,  
18        Sudan
- 19        4) Faculty of Marine Science and Fisheries, Red Sea State University, P.O. Box  
20        24, Port Sudan, Red Sea State, Sudan
- 21        5) Marine Fisheries Administration, Port Sudan, Red Sea State, Sudan

22  
23    \*) corresponding author, e-mail: [eriko@hi.no](mailto:eriko@hi.no)

24

25 **Key-words:** Sudan, coral reef, Red Sea, trap, handline, gillnet, CPUE, data-limited,  
26 fisheries

27

28

29 **Abstract**

30 The semi-enclosed Red Sea harbours one of the longest coral-reef ecosystems on the  
31 planet. The  $\approx$  850 km section of the western shore, comprising the coastline of the  
32 Red Sea State of the Republic of Sudan, has however been sparsely studied. Sudan's  
33 coral reef fishery provides livelihoods to fishers and business opportunities by means  
34 of local and regional trade, however, the knowledge level of the state of the natural  
35 resources and the impacts of fisheries are poorly known. Here we report the results  
36 from the first three comprehensive fisheries research surveys spanning the entire  
37 Sudanese coast in 2012-13, representing a new baseline for the western coast fisheries  
38 resources. The surveys covered the entire coast from inshore down to about 150 m  
39 bottom depth using a combination of baited traps, gillnets and handlines to sample the  
40 various reef habitats and fish assemblages. The results demonstrate a uniform  
41 latitudinal species distribution with peak catch per unit effort rates in and around the  
42 Dungonab Bay area in the north and the outer Suakin archipelago in the south.  
43 Functional diversity (Rao's Q index) was found to be highest in and around the  
44 Dungonab Bay area, thus coming through as a regional hot-spot of biodiversity. The  
45 results form a baseline for future research and monitoring, thus representing key input  
46 for an ecosystem approach to management of Sudan's coastal artisanal fisheries.

47

## 48 **1 Introduction**

49 With its semi-enclosed location between the African continent and the Arabian  
50 peninsula the waters of the Red Sea are warmer and more saline than many other  
51 marine tropical ecosystems [1]. The Red Sea is host to a uniquely rich marine  
52 biodiversity and high prevalence of endemic species [2,3,4]. While the northern reef  
53 areas of Egypt and the Gulf of Aqaba/ Eilat have been extensively investigated [1,5],  
54 the Red Sea proper is generally poorly studied, and only rudimentary studies from  
55 decades back have focused on commercial fisheries [6]. The research published on the  
56 Red Sea ecosystem is dwarfed by that of the Great Barrier Reef and, in particular, the  
57 Caribbean [1], despite equal scientific relevance. The sparseness of information about  
58 the fisheries and the state of the resources harvested severely limits the authorities'  
59 ability to sustainably manage the sector in an effective and directed manner [1].  
60 Institutional capacities in the region are limited and official landings data are sparse  
61 and essentially unreliable. Tesfamichael and Pauly [6] reconstructed the catch  
62 statistics from all Red Sea countries using a combination of unpublished data and  
63 interviews with managers, stakeholders and fishers around the Red Sea. They found  
64 that the reconstructed catches were  $1.5 \times$  larger than the official FAO statistics with  
65 artisanal fisheries dominating, accounting for 49% of the total catch from 1950 – 2010  
66 [6]. These estimates, however, also rely on several assumptions and are too rather  
67 uncertain, and management and enforcement of the fisheries in the region are  
68 essentially based on a highly data-poor knowledge base (Sudan, Eritrea, Yemen) [6].  
69  
70 The Republic of the Sudan's Red Sea State include 853 km of the 2250 km African  
71 (western) Red Sea shore (Figure 1). Although there are large latitudinal gradients in  
72 environmental conditions with salinity increasing to the north and temperature

73 increasing towards the south [6,7], the biological community changes little from north  
74 to south [8]. Most studies from the region are over 50 years old and have primarily  
75 focused on single reef study sites such as the Costeau Conshelf habitation experiment  
76 at Sha'ab Rumi in 1963 [9]. More recently, the Dungonab Bay area north of Port  
77 Sudan was studied and deemed to be of global significance and has subsequently been  
78 included in the UNESCO list of world heritage sites since 2016 along with the  
79 Sanganeb atoll as the “Dungonab Bay – Mukkawar Island Marine National Park” and  
80 the “Sanganeb Marine National Park” [4]. Historically, specimen collectors and early  
81 natural scientists have described the marine fauna [1,10,11], but thus far there have  
82 been no large-scale studies systematically covering the coastal fish assemblages (but  
83 see Kattan et al. [7]).

84

85 The 2008 Equipe Costeau expedition was the most comprehensive study to date, but  
86 has limited value in terms of describing the marine fishery resources as it only  
87 covered a small part of the coast, focusing on local biodiversity rather than abundance  
88 [4,12]. Their teams applied underwater visual census (UVC) methodology to survey  
89 the reef fish assemblages and collect benthic data [12]. Kattan et al. [8] carried out  
90 comparative UVC surveys of Sudanese and Saudi reefs and found the Sudanese reefs,  
91 especially those furthest offshore and to the south, to be in pristine conditions, with  
92 biomass levels approaching those observed at remote Pacific islands and atolls.  
93 However, the Kattan et al. [8] study did not cover the northernmost section of the  
94 Sudanese coast, nor the near shore coastal reef areas.

95

96 Several development aid organizations as well as the Red Sea State government have  
97 pointed to development in the marine fisheries sector as one possible route to

98 increased revenue, food production and employment in coastal communities.

99 However, an appropriate understanding of the fisheries and its resource base, that can  
100 provide guidelines for sustainable harvesting practices and restrictions, is essential in  
101 order for such development to be ecologically and economically sustainable in the  
102 long term [13].

103

104 The data-poor situation as that of the Red Sea State coral reef fishery offers limited  
105 opportunity to draw inference regarding the status and evolution of the fishery, the  
106 resource base and the sustainability [14]. Despite management efforts in coral reef  
107 fisheries worldwide, 55 % of island-based coral reef fish communities are fished in an  
108 unsustainable manner [15], and a review of artisanal coral reef fishery research found  
109 that nearly 90 % of the studies listed overfishing as a concern [16]. Several strategies  
110 have the potential to improve management outcomes, such as strengthening  
111 governance, developing a more nuanced understanding of the interaction between  
112 fishing, alternative livelihoods and human well-being, and explicitly linking gear  
113 selectivity to ecosystem effects [17]. A recent study has raised concern that the roving  
114 coral grouper *Plectropomus pessuliferus marisrubri* and the squaretail coral grouper  
115 *P. areolatus* (Arabic names ‘Najil’ and ‘Silimani’, respectively), both highly valued  
116 target species in the hook-and-line fisheries, are already in an overfished state [18], a  
117 situation documented on the eastern, Saudi Arabian, side of the Red Sea [8,19].

118

119 **BOX – Sudan’s coral reef fisheries**

120 The marine fisheries sector in Sudan is comparatively small with annual catches  
121 reported at 5700 tons according to the official FAO statistics [21,22], while according  
122 to the catch reconstruction of Sudanese fisheries [23] the annual catch for 2010 was

123 2000 tonnes, predominantly from artisanal handline- and gillnet fisheries on and along  
124 the fringes of coral reefs operating from many small landing sites and villages along  
125 the coast. The management of the artisanal fishery is divided into seven management  
126 areas (Figure 1). Tesfamichael and Elawad [23] attributed the discrepancies between  
127 the official catch statistics and the reconstructed catches to misreporting on the side of  
128 the Sudanese fisheries authorities.

129

130 The artisanal fishing fleet currently consists of approximately 2000 fishers operating  
131 about 1000 vessels that are mostly in the range of 6-10 m of length, many equipped  
132 with 30–40 horsepower outboard engines (Marine Fisheries Administration,  
133 unpublished data). Most of these vessels target fin-fish (particularly the high-priced  
134 groupers) and have facilities for storage of ice and catch. With a crew of typically 2-5  
135 fishers these vessels operate throughout the near- and offshore reef systems and  
136 archipelagos for several days up to two weeks per fishing trip. The most common  
137 fishing gear is handline, but mono- and multifilament gillnets are also prevalent in  
138 some areas. Some of the larger vessels bring small flat-bottom dories to reach into  
139 lagoons and onto reef flats to deploy gillnets (barrier nets) for capturing roving  
140 herbivores (parrotfish, surgeonfish) that are chased into the nets by fishers using  
141 snorkelling gear.

142

143 Sudan is the Red Sea country that utilizes its marine resources to the least degree [8]  
144 and compared to other countries bordering the main part of the Red Sea, Sudan has  
145 the lowest catch per km of coastline [6], governing some speculation that there may  
146 be room for expanding fisheries yields.

147

148 **1.1 Aims**

149 The project “Surveys of renewable marine resources in the Red Sea State” was  
150 implemented in the period from 2012 to 2013 [24] with the main aim to provide a  
151 baseline study of the available fish resources along the entire coast. Three monitoring  
152 surveys using different fishing methods were carried out, at two at different periods of  
153 the year, and in two subsequent years. Because institutional and technical capacity in  
154 Sudan was limited the project opted to employ survey and monitoring methods that  
155 required as little technology and resources as possible while still gathering quality  
156 data. This approach thus excluded diver-based methods like UVC that requires  
157 extensive training, expensive equipment and costly maintenance of equipment.

158

159 During each survey, conventional fishing methods such as gillnets and handlines were  
160 operated in conjunction with baited traps to sample the proportion of fish assemblages  
161 vulnerable to these fishing gear types, thus enabling comparison of the efficiencies of  
162 various fishing methods for monitoring fish assemblages in coral reef areas. The  
163 project also provided training opportunities for local scientists, managers and students  
164 in fisheries research and monitoring methods.

165

166 Here, we report on the catch rates, species densities and functional diversity from trap,  
167 gillnet and handline catches obtained during three surveys conducted in November  
168 2012, May 2013 and November 2013 covering all seven management regions of the  
169 Sudanese coast (Figure 1). Here we document a baseline of the fisheries resources  
170 along the coast of Sudan and provide updated information on biodiversity hot spots,  
171 distribution and indices of relative abundance. The results provide valuable basic  
172 biological information on several Red Sea fish species that are currently unavailable

173 in the public domain (FishBase) [24], and are relevant with regards to the ecological  
174 understanding of fish communities in the Red Sea

## 175 **2 Material and Methods**

176 The sampling scheme was stratified according to the seven established fisheries  
177 management areas (Figure 1). The Sudanese coastal shelf is narrow, especially in the  
178 north, before it drops off into the deep waters of the central Red Sea. Extensive  
179 fringing near-shore coral reefs extend over much of the shelf area complicating both  
180 navigation and anchoring, effectively restricting surveying to well-established sea-  
181 ways during daytime, consequently producing a somewhat patchy sampling design  
182 (Figure 2).

183

184 The surveys covered the coast from Egypt in the north to the border with Eritrea in the  
185 south. Two vessels were used: the M/S 'Don Questo' (32 m LOA), a previously  
186 British oceanographic research vessel currently equipped for liveaboard diving, was  
187 used as base for measurement and sampling of the catch, accommodation and meals,  
188 and a sheltered fiberglass vessel (10 m LOA) with an inboard engine was used to  
189 deploy and retrieve traps and for oceanographic measurements.

190

191 The same locations were sampled on each cruise in the northern and central regions to  
192 ensure comparability between surveys, producing similar geographical coverages  
193 there (Figure 2). In the southernmost part of the study, however, challenging weather  
194 conditions restricted the degree of coverage and in November 2013 the survey had to  
195 be cut short due to technical delays. The reef at Hably Lory was only sampled in May  
196 2013, while the reef location at Abu Marina was not sampled in November 2013



197

## 198 **2.1 Fishing gear**

199 In addition to the fishing gear used conventionally by Sudanese fishers (handlines and  
200 gillnets), an alternative approach using collapsible baited fish traps was employed to  
201 obtain samples from the coral reefs with minimum damage to coral colonies and to  
202 target species with low catchability using the artisanal handline method.

203

204 *Baited traps* – The main fishing gear used were collapsible fishing traps baited with  
205 sardines. The traps measured 150 × 180 × 80 cm and were constructed from steel  
206 frames with plastic coated square steel mesh with approximately 50 mm bar length.  
207 The number of traps deployed at each reef area ranged from 5 to 14, depending on the  
208 site-specific geography (topography and reef length) and weather conditions (wind  
209 strength and wave heights) at the time when traps were deployed. The traps were  
210 deployed at a mean depth of 21.5 m, but depth varied from 5 – 145 m between areas  
211 and surveys (Figure 3). Mean set depth never exceeded 50 m, but deeper traps were  
212 set in all areas except area 5 in November 2012, with the deepest traps set at 142 m in  
213 area 1 in Nov. 2012 and at 145 m in area 2 in May 2013 (Table 1, Figure 3). Area 5  
214 had the shallowest distribution of trap set depths (and for May 2013 and Nov. 2013  
215 the shallowest mean trap set depth), consistent with this area being inshore of the  
216 outermost reefs hence having a shallower average topography than the other  
217 management areas. When using traps fish were caught alive and in good conditions,  
218 thus any sharks, moray eels or other red-listed species were immediately released  
219 upon retrieval of the gear. Whenever caught, species ID and approximate length was  
220 noted prior to their release.

221

222

223 Gillnets – Pelagic gillnets were deployed at dusk and hauled at dawn, recording the  
224 exact time of setting and hauling. The nets were inspected hourly to release any  
225 sharks or turtles caught inadvertently, after the species, approximate length and catch  
226 position had been recorded. Turtles, however, were not identified or recorded in the  
227 data. Two types of pelagic gillnets were used at each site: two multi-monofilament  
228 gillnets of 28.0 m length and 10.5 m height with 89 mm mesh size (stretched), and  
229 one multifilament gillnet of 40.0 m length and 10.5 m height with 76 mm mesh size.  
230 The gillnets were anchored to the bottom at one end, with a float attached at both  
231 ends, and smaller floats running along the float line to ensure that it floated at the  
232 surface. Nets were deployed in channels between reefs, or in open waters inshore or  
233 off-shore of the reefs. At some particular shallow stations, the gillnets reached from  
234 the surface to the bottom.

235

236 Handlines – On some locations, during daytime, simple monofilament handlines with  
237 a single hook (size 5 – 6) and lead sinker were fitted with fresh bait (sardines) and  
238 fished by 2-3 fishermen. The fishermen were told to fish for a standard period of two  
239 hours and record the time they started and stopped fishing. However, this information  
240 was not well communicated, and for most locations the fishermen returned the next  
241 day with the catch but lacking records of how long they had been fishing. Therefore the  
242 actual duration of the fishing trials was uncertain and resulting catches could thus  
243 only be used for composition of the catch by gear type rather than catch rates as  
244 anticipated.

245

246 In total 760 stations were sampled during the three surveys (Table 1). The number of  
247 gear units deployed increased during the second and third survey because the  
248 participants had gained experience and worked more efficiently. Traps were the most  
249 common gear with 674 sets. However, 25 % (220 traps) were empty when hauled,  
250 compared to only 5 % of gillnet hauls being empty. Use of gillnets increased from 34  
251 in the first survey to 137 in the November 2013 survey, while the use of handlines and  
252 traps remained more constant (see Table 1).

253

254

## 255 **2.2 Biological measurements**

256 Upon gear retrieval fish caught were removed and placed in numbered plastic boxes  
257 on the deck of the vessel where they asphyxiated, as is the normal practice in fisheries  
258 operations throughout history as well as in modern fisheries research surveys. This is,  
259 however, seldom specified in articles describing fisheries research surveys (see [26-  
260 28] for examples).

261

262 The length-weight relationship for sharks and moray eels, which were released  
263 immediately after capture, was estimated from published length-weight relationships  
264 [25]. All other species caught were brought to the ‘Don Questo’ where they were  
265 identified to species, and their total lengths and total wet weights were recorded.

266

267

## 268 **2.3 Calculation of catch-per-unit-effort**

269 Assuming that the catch coefficient remains constant, the catch-per-unit-effort  
270 (CPUE) is proportional to abundance [6], although with caveats regarding  
271 hyperstability (CPUE remains stable while abundance is declining) and

272 hyperdepletion (CPUE declines more than the actual decline in abundance) [29]. To  
273 facilitate relative comparisons between surveys and gear, CPUE for each species  
274 group were standardized as kg fish caught per hour of fishing.

275

276 The catch data contained many stations with no catch resulting in CPUE data being  
277 non-normal, and rather zero-inflated. Variabilities in CPUE's between areas, surveys  
278 and by depth were therefore evaluated using a zero-adjusted GAM model with depth,  
279 area, survey and gear as dependent factors, calculated using the "GAMLSS" package  
280 in R. Two models, including or excluding gear as a factor, were evaluated. As the  
281 AIC were comparable (-1080 and -1082) we chose to use the model including gear as  
282 a factor as this would yield information on the potential effect of gear on CPUE.

283

#### 284 **2.4 Species diversity and functional diversity**

285 Species caught were classified according to the species traits of Stuart-Smith et al  
286 [30]: trophic group (carnivores, herbivores, corallivores, invertivores, planktivores),  
287 trophic level, maximum length, place in water column, diel activity, habitat and  
288 gregariousness. Following the methods of Stuart-Smith et al. [30], we evaluated  
289 species density and functional diversity to delineate biodiversity of the catchable  
290 component of coastal fishes along the Sudanese coast. Estimation of biodiversity  
291 measures were done using the catch data from traps only as neither the gillnets nor  
292 handlines covered all management areas during all surveys (see Table 1).

293

294 Species densities were calculated as the number of species caught at each station area  
295 per hour of fishing, and averaged by management area,. Variability in species density

296 between stations was evaluated using a zero-adjusted GAM model with depth, area  
297 and survey as dependent factors, and calculated using the “GAMLSS” package in R.

298

299 The Rao’s Q functional group richness index was calculated using the ‘dbFD’  
300 function in the ‘FD’ package in R using all species occurring in three or more traps  
301 aggregated across all surveys applying ‘lingoes’ correction to achieve an Euclidian  
302 species by species distance matrix. Dimensionality was limited to 10 PCoA axes to  
303 avoid integer overload during calculations. The quality of the reduced vector space  
304 representation of the traits,  $R^2$ , was 0.42 with 10 PCoA axes, using all traits. To  
305 evaluate the contribution of individual trait on the functional diversity the model was  
306 rerun seven times excluding one trait at a time. As the  $R^2$  was lower for all models  
307 excluding a trait, except when excluding maximum length, when  $R^2$  increased to  
308 0.468, an increase of 0.047, the model excluding maximum length was adopted. This  
309 observed increase in  $R^2$  when excluding maximum length was likely caused by the  
310 large spread in maximum length across the species caught, with few catches of  
311 species with a maximum length > 200cm (mostly sharks, morays and large  
312 Scombridea).

313

314

## 315 **2.5 Data management, statistical and GIS analysis**

316 All data from the surveys were entered into a NAN-SIS [31] database. The tropic  
317 group of species in our samples was added to the catch data from a list of traits of  
318 coral reef fish from [30], amended with information from FishBase [25] for the Red  
319 Sea species not covered in the original species traits list. Detailed information on the  
320 position, depth, date, and time, for all fishing stations and all three gear-types as well  
321 as species-specific catch information was recorded in the data files (station.csv and

322 catch.csv) deposited on GitHub (<https://github.com/erikjsolsen/Sudan>). All plotting  
323 and statistical analysis was carried out using the R Statistical software package  
324 version 3.5.2 (Eggshell Igloo) [32]. The scripts used for all plots and analyses are also  
325 made available on GitHub.

326

327

### 328 **3 Results**

329

#### 330 **3.1 Catch composition by gear**

331 The catch composition of the three fishing gears was markedly different (Figure 4, A),  
332 with the gillnets being the only gear catching species in the Chirocentridae family.

333 Trap catches were dominated by Serranidae, Lutjanidae, Lethrinidae and ‘other

334 species’. Gillnets were the most efficient gear towards Carangidae and Scombridae

335 but caught relatively few Lutjanidae and Lethrinidae species that made up the

336 majority of the handline and trap catches. Serranidae were rare in the handline

337 catches, except in May 2013, contrasting the prevalence of larger bodied serranid

338 groupers in the artisanal handline fishery. In terms of trophic groups (Figure 4, B),

339 carnivores dominated the gillnet catches and was the most important trophic group in

340 the trap catches. Invertivores constituted the second largest catch of the traps, while

341 planktivores were the second largest catch of the gillnets. Hand-lines only caught

342 carnivores and invertivores, of which the former dominated the catches.

343

344

#### 345 **3.2 Cath per unit effort (CPUE)**

346

347 3.2.1 Effect of gear, survey, area and depth on CPUE.

348 Catch rates between management areas showed large variabilities (Figure 5).  
349 Evaluating the combined effects of gears, depth, management area and survey on the  
350 biomass CPUE in a zero-adjusted Gamma GAM model (AIC: 307, df:14,– see SI  
351 Table 1 for a full summary of model analysis) showed that all gear types, survey  
352 (November 2013), and area (areas 1, 5, 6 and 7) had a significant effect, while depth  
353 did not have a significant effect on catch rates. Area 2 had the highest recorded CPUE  
354 in all three surveys, while area 3 had the highest average CPUE in Nov. 2012, area 6  
355 in May 2013 and area 6 in Nov. 2013 (Table 2). Relative difference in catches of the  
356 different family groups varied between the surveys (see Figure 4).

357

358

359 3.2.2 Trophic group composition of catches for traps

360 The trap catches (Figure 6) were dominated by the carnivores in all areas during all  
361 surveys, except during the Nov. 2012 survey for area 3 where the invertivores had  
362 higher CPUE. Corallivores were only caught during the Nov. 2012 survey in areas 2  
363 and 6, while herbivores were caught in all surveys, with the highest catch rates in area  
364 2 and 6. Invertivores had the second highest catch rates, present in all surveys, but  
365 with highest CPUE in the Nov. 2012 and May 2013 surveys. Planktivores were  
366 caught at very low CPUE in area 7 during the Nov. 2012 survey, but in May 2013  
367 they were also caught (at low CPUE rates) in areas 2, 3, and 5 (but not in area 7),  
368 while in Nov. 2013 they had the second highest catch rate in area 2 (after the  
369 carnivores) and were also caught in areas 5 and 6.

370

371 3.2.3 CPUE of trophic groups by depth for traps

372 Carnivores and invertivores were caught in traps at 0-100 m depth in all management  
373 areas (with some few carnivores caught even deeper, with the highest CPUE, kg/hrs,  
374 shallower than 50 m depth (Figure 7). Herbivores had a more restricted range, with no  
375 catches made deeper than 65 m bottom depth. There were only two catches of  
376 corallivores, the threadfin butterflyfish *Chaetodon auriga*, one in area 2 at 55 m depth  
377 and the other in area 6 at 17 m bottom depth. Planktivores were generally caught near  
378 the surface, shallower than 25 m, except for one catch of *Paracaesio sordius*  
379 (Lutjanidae) in area 7 at 66 m bottom depth(Figure 7).

380

381 3.2.4 Trophic level of trap catches

382 The mean trophic level in the catches was 3.84, with averages per area and survey  
383 ranging from 3.20 (area 3, Nov. 2013 survey) to 3.97 (area 3, May 2013 survey)  
384 (Figure 8), although when averaged across surveys the range in trophic level  
385 narrowed to 3.76 in area 6 to 3.83 in area 1 (Table 2). Trophic level per area and  
386 survey was dependent on balance in occurrence between trophic groups as the  
387 carnivores have a higher trophic level than the invertivores, the two most common  
388 trophic groups in the trap catches.

389

390 3.2.5 Other functional traits of the trap catches: placement in the water column,  
391 gregariousness and diel activity

392 The majority of the trap catches were of species classified as demersal, which were  
393 caught in all areas and during all surveys. These were dominating the catches except  
394 in area 3 during survey 2 where benthic species were most common (Figure 9).  
395 During the November 2013 survey there was no station with catches other than  
396 demersal fish, while both benthic and pelagic species were caught in the other two



397 surveys, benthic fish being the second most common group after the demersals. The  
398 most dominant family groups of demersals were the Lutjanidae (mainly *Lutjanus*  
399 *bohar* and *L. gibbus*) and Lethrinidae (mainly *Lethrinus lentjan* and *L. mahsena*),  
400 while the benthic group was dominated by the moray eel *Gymnothorax javanicus*.  
401 Carangidae (most common species being *Carangoides bajad*) and Scombridae (most  
402 common species *Scomberoides lysan*) were the two most common families in the  
403 “Non-site attached pelagic” group.

404

405 Day-active fish dominated the catches in all areas and surveys. Night active fish were  
406 hardly caught during the November 2013 survey, but were prevalent in the November  
407 2012 survey particularly in area 3 (SI Figure 1).

408

409 Solitary fish (gregarious level 1) were the most common in the trap catches, except in  
410 areas 6 and 7 during the May and November 2013 surveys and in area 4 during the  
411 November 2012 survey where species of gregarious level 2 were most abundant.

412 Species of gregarious level 3 were caught in the November 2012 and May 2013, and  
413 only in areas 2, 3, 5 and 7, but not at all during the November 2013 survey (SI Figure  
414 2).

415

416

### 417 **3.3 Species density**

418 The highest number of species was observed in area 2 (36), followed by area 3, 6 and  
419 7 (25 in each). Species density (number of species per hour of fishing - soak time of  
420 traps) ranged from 0.008 (areas 1, 2 and 6) to 0.019 (area 4) (Table 2). Area 4 had the  
421 highest species density across all surveys, while the area with the lowest species  
422 density varied by survey: area 1 in November 2012 , area 7 in May 2013 , and area 2

423 in November 2013 (Figure 10). The variability and relative difference in rank of  
424 species diversity per area was confirmed by the zero-adjusted GAM model (AIC: -  
425 4161, df: 12), where all surveys were significant factors in the model. In addition, area  
426 1, 2, 3 and 4 were also significant factors affecting species density, while the non-  
427 significant factors were depth, and areas 5, 6 and 7 (see SI Table 2 for details).

428

429

### 430 **3.4 Functional diversity**

431 The Rao's Q functional group richness index estimated using the functional diversity  
432 model excluding the 'max length' trait was highest (0.102) in area 2 and lowest  
433 (0.050) in area 6 (Table 2). The second-highest Rao's Q index was found in area 5  
434 (0.085). This was similar to the Rao's Q index calculated from the model including all  
435 traits were area 2 had the highest and area 6 the lowest Rao's Q index.

436

## 437 **4 Discussion**

438 The three surveys conducted in 2012 and 2013 constitute the first baseline monitoring  
439 of harvested fish along the Sudanese Red Sea coast. The first survey in November  
440 2012 was essentially a pilot survey testing the efficiencies, and performance of  
441 various fishing gear in this region. There were significant statistical differences in  
442 both catch rates, species diversity and functional diversity between the three surveys,  
443 with the November 2013 survey being most limited, both in terms of sampling  
444 intensity and geographic coverage in the southern region (Table 1) and sampling  
445 density in area 3 compared to the previous two surveys (Figure 2).

446

447 Our sampling aimed at covering representative reefs along the entire coast at varied  
448 depths. As the species composition of coral reefs is known to be depth-stratified we  
449 intended to use gillnets to sample the surface layer, and traps and handlines to sample  
450 from the surface to 200 m. However, sampling was effectively limited by bottom  
451 conditions, e.g., ledges, and avoiding entanglement in corals. This proved challenging  
452 as the seaward side of the reefs typically had steep drop-offs to depths, often  
453 exceeding 200 m, while the areas between reefs or towards shore typically had depths  
454 of less than 100 m. Consequently, few traps were set at depths deeper than 75 m  
455 (Figure 3). Nevertheless, we achieved a reasonably comparable coverage of depths in  
456 all management areas, except for in area 5 (all surveys) and area 4 (Nov. 2012 survey)  
457 (Figure 3), thus avoiding biasing our analysis of catch rates and species diversity by  
458 differences in depth. This is further confirmed by the GAM models of CPUE and  
459 species density (S1 Table 2) where depth was not found to have a significant effect on  
460 neither CPUE nor species density.

461

462 The present analysis took a practical fisheries approach on catch per unit effort,  
463 species densities and functional diversity, focussing on the differences between the  
464 seven fisheries management areas rather than biogeographic approaches evaluating  
465 effects of distance to shore used in studies of Saudi Arabian reefs [7,20].

466

467 Our results confirmed the presence of species already known to inhabit the Sudanese  
468 coast, although the methods used inevitably selected catchable fish above certain sizes  
469 and particular species due to the selective properties of the fishing gear, i.e. mesh  
470 selectivity (escapement, gilling, entanglement), hooks (minimum and maximum target  
471 sizes) and bait (species- and size dependent preferences and behaviour). With trap

472 stations constituting 89% of our stations across all three surveys, it was unsurprising  
473 that the major trophic group caught were carnivores (Figure 6) as these were the  
474 species most likely to be attracted to bait. Our trap-based method was thus sub-  
475 optimal to survey herbivorous fish species such as parrotfish and most surgeonfish,  
476 and fish closely associated with coral reef habitats were most likely considerably  
477 underestimated in the catches. For such species, underwater visual census (UVC)  
478 methods, or baited remote under-water video (BRUVs) remain the only current  
479 alternatives, albeit outside the scope of this study. However, for certain vagile species  
480 such as snappers (Lutjanidae), emperors (Lethrinidae) and Scombridae the use of  
481 baited traps proved appropriate, filling a gap where handlines and gillnets were  
482 proven inefficient (see Figure 4).

483

484 The differences in catch composition compared to the artisanal fishery that targets  
485 reef-dwelling species like groupers was apparent [23], with snappers (Lutjanidae)  
486 dominating the trap catches (Figure 4). This illustrates a potential for development of  
487 fisheries targeting the snappers, emperors and other species roaming between reefs by  
488 changing the current artisanal fishery to other gear types like traps and fishing  
489 locations. Similarly, our gillnet catches caught a markedly different species  
490 composition than handline and traps, that were more similar (Figure 4). For  
491 Serranidae, Scombridae, Lutjanidae and Lethrinidae, the differences between gillnet,  
492 traps and handlines were particularly apparent. Serranidae, the family containing the  
493 most sought-after target species in the artisanal fishery, was only somewhat prevalent  
494 in handline catches from the May 2013 survey (Figure 4). This coincides with the  
495 spawning season of the commercially important *Plectropomus* spp. [18, 34], and  
496 related species. That the presence of Serranidae in handline catches is almost

497 exclusive to this survey is likely due to increased vulnerability to harvesting in the  
498 time of spawning and -aggregation. Some species of Scombridae were only caught by  
499 gillnet which was also the most efficient gear for capturing carangids. Some  
500 Lutjanidae (e.g. *Lutjanus bohar*) were, however, caught on both gillnets, traps as well  
501 as handlines. This is to be expected given that gillnets mostly fished the upper part of  
502 the water column, while traps and handlines fished at or near the bottom, the two  
503 gears thus targeting different habitats. Similarly, from a trophic perspective this  
504 makes sense as planktivorous fish typically are pelagic, as is seen from our trap  
505 catches where planktivores were only caught in traps set shallower than 65m bottom  
506 depth (Figure 7), although it was initially surprising that planktivores were indeed  
507 caught in baited traps. The multi-gear approach was indeed chosen precisely for this  
508 reason – to sample and investigate different depth habitats of the same reef ecosystem.  
509

#### 510 **4.1 Catch-per-unit-effort**

511 CPUE varied significantly by gear, area and survey, but not by depth (Table 2, and S1  
512 Table 1). The depth ranges of our stations fished were limited, with most traps set  
513 shallower than 50 m bottom depth, which probably explains why depth was not a  
514 significant factor in the model. Gillnet CPUE was higher than that of traps in all  
515 areas, and higher in the northernmost areas (1 and 2) compared to the southernmost  
516 areas (6 and 7), also with a higher standard deviation (0.482 vs 0.033). This indicated  
517 a possible higher abundance of pelagic fish along the northern part of the coast,  
518 compared to the south.

519

520 Our findings of the lowest trap CPUE in the Port Sudan and Suakin areas (4 and 5)  
521 are similar to Klaus et al. [12] who also found the lowest fish abundance in the Suakin

522 area. The Dungonab area (2) had the highest CPUE for traps in addition to the highest  
523 diversity of trophic groups in the catches (Figure 6) and the highest functional  
524 diversity (Rao's Q index - see Table 2), indicating that this is the most productive  
525 region north of Port Sudan. It is also the area to the north with the widest shelf and  
526 largest shallow-water region, also bordering on the very shallow Dungonab Bay with  
527 relatively higher salinity [24]. The Dungonab Bay is a designated marine protected  
528 area covering most of management area 2, granting access to local fishers only,  
529 probably reducing fishing pressure in this area. However, several previously known  
530 spawning aggregations for *Plectropomus* spp. in this area are considered lost due to  
531 fishing [34]. Area 3, just south of Dungonab bay, had the second-highest trap CPUE  
532 (0.136) and functional diversity (Rao's Q = 0.074) pointing to a possible ecological  
533 linkage of fish communities between these two areas.

534 The two southernmost areas had higher trap CPUE than the Suakin and Port Sudan  
535 areas (4 and 5), although lower than in the northernmost areas, corroborating Kattan  
536 et al. [8] who found a positive relationship between top predator biomass and distance  
537 to the nearest port. Kattan et al. [8] hypothesized that fishing pressure diminishes with  
538 distance to port as fishermen prefer close and more near-shore reefs over more distant  
539 off-shore reef areas. However, these results are not consistent, exemplified by the  
540 high CPUE estimated for Dungonab (area 2). This may, however, be explained by the  
541 higher level of protection and management in this area compared to other inshore  
542 areas. Nevertheless, our results, taken together with the results of Klaus et al. [12]  
543 and Kattan et al. [8], do indicate that the local artisanal fisheries have impacts on local  
544 fish stocks.

545

546 In contrast to Klaus et al. [12], who noted the absence of large snappers, groupers and  
547 emperors in the UVCs conducted, the present surveys found these species in  
548 abundance (although large individuals were relatively rare). This can be explained by  
549 the more extensive geographic coverage, the greater depth of the sampling gear  
550 compared to UVC depths, and larger number of sampling stations in our study than in  
551 the Klaus et al. [12] study. It can also be explained by the difference in catchability of  
552 fishing gear compared to the UVC survey employed by Klaus et al. [12]. Snappers  
553 and emperors, and to a lesser degree groupers, showed a roving behaviour between  
554 reefs when observed during dives and snorkelling, often keeping a distance from  
555 divers (personal observations), similar to what Colton and Swearer [35] observed for  
556 mobile predators, possibly making them less available in UVC transect paths. These  
557 species were, however, attracted to baited traps, explaining their common occurrence  
558 in catches in the present study.

559

#### 560 **4.2 Species density and functional diversity**

561 There were differences in species densities between the seven management areas  
562 (Table 2). The highest densities was found in area 4 (Port Sudan), which also was  
563 significantly different from all other areas. The species density results are thus in  
564 contrast with Kattan et al.'s [8] findings of relatively higher biodiversity in remote  
565 areas of the coast. Our present analysis was limited by the low number of stations in  
566 several areas and surveys, in particular area 4. When evaluating the functional  
567 diversity, a different picture emerges. Area 2 had the highest Rao's Q value of all the  
568 areas (0.102), while area 4 had a lower Rao's Q of 0.063 in the model excluding the  
569 maximum length trait. If maximum length was included in the model area 4 had the  
570 lowest Rao's Q value of all areas. Functional diversity (Rao's Q) was calculated

571 using CPUE as the abundance data, thereby weighing the species occurrence not just  
572 on hours fishing, but also by the catch weight, contrasting species densities where the  
573 species occurrence were weighted only by the fishing time. Since the CPUE in area 2  
574 on average was higher than in area 4, except during the November 2013 survey  
575 (Figure 5), this is the most likely explanation of the discrepancies between the species  
576 densities and functional diversity. Stuart-Smith et al [30] argues that since the  
577 ecological effects of a species generally are proportional to its abundance, abundance-  
578 weighted functional diversity (e.g. Rao's Q) more accurately reflects the functional  
579 structure of a community than diversity metrics based on simple counts or species  
580 inventories. We therefore placed higher emphasis on the Rao's Q indices in the  
581 present analysis than on species density. The higher Rao's Q in the Dunognab area  
582 (area 2) and the low Rao's Q in area 4 indicate that the protected Dungonab bay area  
583 has a higher functional biodiversity than the Port Sudan area (area 4) which is the  
584 most heavily impacted by human activities along the Sudanese coast.

585  
586 The lack of clear gradients in species distribution or geographically unique species  
587 indicates that the species caught in our sampling gear have fairly uniform distributions  
588 along the Sudanese coast. This could be expected given the lack of species gradients  
589 observed elsewhere in the Red Sea [3,7]. It is inevitable that the capture-based  
590 methodologies employed to cover the entire coast during surveys has resulted in  
591 missing locally rare or endemic species. There are other issues pertaining to gillnet  
592 and trap fishing in coral reef areas that make them less desirable from a biodiversity  
593 and fisheries conservation science perspective, such as ghost nets/traps, and bycatch  
594 of illegal and/ or vulnerable species (e.g., sharks). Selective passive gears, like traps  
595 can, however, be employed with less environmental impact or bycatch of threatened



596 elasmobranch species than pelagic gillnets or long-lines, while traps without bio-  
597 degradable openings may cause ghost fishing if lost.  
598  
599 Klaus et al. [12] identified the 70 km coastal region between Port Sudan and Suakin  
600 as being the most heavily affected by coastal and harbour developments and  
601 contended the notion that this had affected the reefs in this area. This is further  
602 corroborated by Kattan et al. [8], who found that biomass and species richness  
603 decreased with distance from the main port of Port Sudan. However, distance to Port  
604 Sudan is a misleading measure of the distance fishers have to travel to catch fish as  
605 they operate out of numerous landing sites all along the coast. A better measure of  
606 distance to fishing areas would be to measure the distance of the actual fishing trips  
607 from the local landing sites. However, our results did show low species density and  
608 functional diversity (Rao's Q), and a lack of herbivores and planktivores in the Port  
609 Sudan management area and in the Arakia area just to the north, supporting the  
610 hypothesis that increased urban development and proximity to population centres  
611 have resulted in a mining out of catchable fish biomass and reduced the productivity  
612 of reefs. In management area 3 and 4 the higher human populations and number of  
613 fishermen based in these regions have likely increased fishing pressures more than in  
614 other areas, thus representing two highly likely factors in explaining the low species  
615 diversity and lower catch rates in these regions.  
616  
617  
618

### 619 **4.3 Recommendations**

620 Whether traps are more appropriate than visual census methods, which may  
621 underestimate species that actively avoid divers doing the census [35, 36], or are  
622 reluctant to approach a baited camera rig during the relatively short recording time,  
623 remains to be properly tested for species typically targeted by Sudan's artisanal coral  
624 reef fishery. In a study comparing the relative efficiency of commercial fish traps and  
625 BRUVs in sampling tropical demersal fishes in Western Australia, Harvey et al. [37]  
626 found that BRUVs had greater statistical power to detect changes in abundance than  
627 an equivalent number of traps. Among five commercially important Indo-Pacific  
628 species (*Epinephelus bilobatus*, *Epinephelus multinotatus*, *Lethrinus punctulatus*,  
629 *Lutjanus russelli* and *Lutjanus sebae*) only emperor red snapper (*L. sebae*) was more  
630 efficiently sampled with commercial traps. However, a monitoring system based on  
631 traps requires lower skill levels and less infrastructure than UVC- and BRUV  
632 methodology, and most species will survive capture and subsequent release if a non-  
633 extractive approach to monitoring is desired. Traps also have their drawbacks in being  
634 bulky, requiring a winch to haul and will involve more sea time if soaked overnight.  
635 Evaluating such practical constraints is essential when planning and designing fish  
636 monitoring programs in least developed countries with poor institutional capacities  
637 and limited resources like Sudan. Still, our results show the merit of a multi-methods  
638 approach to monitoring in a complex coral reef ecosystem area like the Red Sea.

639

### 640 **4.4 Conclusions**

641 We here present the first baseline survey of the fisheries resources along the Sudanese  
642 Red Sea coast, providing novel insights into the distributions, catch rates, species  
643 densities and functional diversities of fish communities along the Sudanese coast,

644 supplementing the rather scant biogeographic information available on fish species in  
645 this area

646

647 Our results demonstrate differences in CPUE, highlighting the Dungenab Bay area as  
648 a hot spot. The methods used do, however, not provide a full census of all fish species  
649 in the areas and the surveys did not cover all habitats. The methods presented should  
650 therefore be further developed and complemented with visual census-based methods  
651 to cover the full diversity, and include all functional groups. Such a complementary  
652 approach may yield further improved assessment of the fish distribution, abundance  
653 and species richness in the highly complex coral-reef environment of the Sudanese  
654 coast.

655

656 The observed species densities, functional diversity and catch rates demonstrate clear  
657 local (Figure 8) and seasonal variabilities (Figure 6), as well differences in CPUE  
658 between management regions that can be hypothesised to be caused by varying  
659 degrees of human impacts along the coast of Sudan. With an increasing human  
660 population, increasing coastal development and a push to expand and increase  
661 fisheries, sustainable and ecosystem-based management plans should be developed,  
662 implemented and enforced to avoid overfishing, habitat destruction and the associated  
663 negative socioeconomic impact on the poor and fragile fishing communities along the  
664 coasts of the Red Sea. The present study provides a first baseline to use as foundation  
665 for developing such plans.

666

## 667 **5 Acknowledgements**

668 We wish to acknowledge the support from the Sudanese partner institutions: The  
669 Marine Fisheries Administration, The Fisheries Research Institute and the University  
670 of the Red Sea State – Faculty of Marine Science. Asbjørn Aasen of the IMR is  
671 thanked for designing and building the collapsible traps used in these surveys. The  
672 scientific and technical crew on the ‘Don Questo’ are thanked for their dedicated  
673 work with sample collection. Rick Stuart Smith is thanked for providing a table of  
674 biological traits for coral reef fish species. Funding was provided by the Norwegian  
675 Government through the Embassy in Khartoum, and the project was administrated by  
676 UNIDO.

## 677 **6 References**

- 678 1. Berumen ML, Hoey AS, Bass WH, Bouwmeester J, Catania D, Cochran JEM,  
679 et al. The status of coral reef ecology research in the Red Sea. *Coral Reefs*.  
680 2013;32: 737–748. doi:10.1007/s00338-013-1055-8
- 681 2. DiBattista JD, Howard Choat J, Gaither MR, Hobbs JPA, Lozano Cortés DF,  
682 Myers RF, et al. On the origin of endemic species in the Red Sea. *Journal of*  
683 *Biogeography*. 2016;43: 13–30. doi:10.1111/jbi.12631
- 684 3. DiBattista JD, Roberts MB, Bouwmeester J, Bowen BW, Coker DJ, Lozano  
685 Cortés DF, et al. A review of contemporary patterns of endemism for shallow  
686 water reef fauna in the Red Sea. *Journal of Biogeography*. 2nd ed. 2016;43:  
687 423–439. doi:10.1111/jbi.12649
- 688 4. Kessel ST, Elamin NA, Yurkowski DJ, Chekchak T, Walter RP, Klaus R, et  
689 al. (2017) Conservation of reef manta rays (*Manta alfredi*) in a UNESCO  
690 World Heritage Site: Large-scale island development or sustainable tourism?  
691 *PLoS ONE* 12(10): e0185419. <https://doi.org/10.1371/journal.pone.0185419>  
692
- 693 5. Loya Y, Genin A, el-Zibdeh M, Naumann MS, Wild C. Reviewing the status of  
694 coral reef ecology of the Red Sea: key topics and relevant research. *Coral*  
695 *Reefs*. 2014;33: 1179–1180. doi:10.1007/s00338-014-1170-1
- 696 6. Tesfamichael D, Pauly D. Introduction to the Red Sea. *The Red Sea Ecosystem*  
697 *and Fisheries*. Dordrecht: Springer, Dordrecht; 2016. pp. 1–19.  
698 doi:10.1007/978-94-017-7435-2\_1

- 699 7. Roberts MB, Jones GP, McCormick MI, Munday PL, Neale S, Thorrold S, et  
700 al. Homogeneity of coral reef communities across 8 degrees of latitude in the  
701 Saudi Arabian Red Sea. *Marine Pollution Bulletin*. 2016;105: 558–565.  
702 doi:10.1016/j.marpolbul.2015.11.024
- 703 8. Kattan A, Coker DJ, Berumen ML. Reef fish communities in the central Red  
704 Sea show evidence of asymmetrical fishing pressure. *Mar Biodiv*. Springer  
705 Berlin Heidelberg; 2017;6: 1–12. doi:10.1007/s12526-017-0665-8
- 706 9. DuTemple LA. Jacques Cousteau. Minneapolis: Lerner Publications Company;  
707 2000.
- 708 10. Randall JE. *The divers guide to Red Sea reef fishes*. London; 1996.
- 709 11. Debelius H. *Red Sea reef guide*. 5 ed. Frankfurt: IKAN; 2011.
- 710 12. Klaus R, Kemp J, Samoilys M, Anlauf H, Din El S, Abdalla EO, et al.  
711 *Ecological patterns and status of the reefs of Sudan*. 2009. pp. 1–5.
- 712 13. Bundy A, Chuenpagdee R, Boldt JL, de Fatima Borges M, Camara ML, Coll  
713 M, et al. Strong fisheries management and governance positively impact  
714 ecosystem status. *Fish and Fisheries*. 2016;18: 412–439. doi:10.1111/faf.12184
- 715 14. Pauly D, Zeller D. Accurate catches and the sustainability of coral reef  
716 fisheries. *Current Opinion in Environmental Sustainability*. Elsevier B.V;  
717 2014;7: 44–51. doi:10.1016/j.cosust.2013.11.027
- 718 15. Newton K, Côté IM, Pilling GM, Jennings S, Dulvy NK. Current and future  
719 sustainability of island coral reef fisheries. *Current Biology*. 2007;17: 655–658.  
720 doi:10.1016/j.cub.2007.02.054
- 721 16. Johnson AE, Cinner JE, Hardt MJ, Jacquet J, McClanahan TR, Sanchirico JN.  
722 Trends, current understanding and future research priorities for artisanal coral  
723 reef fisheries research. *Fish and Fisheries*. Blackwell Publishing Ltd; 2013;14:  
724 281–292. doi:10.1111/j.1467-2979.2012.00468.x
- 725 17. Nash KL, Graham NAJ. Ecological indicators for coral reef fisheries  
726 management. *Fish and Fisheries*. 2016;17: 1029–1054. doi:10.1111/faf.12157
- 727 18. Elamin S. Stock assessment and population dynamics of *Plectropomus*  
728 *pessuliferus* and *Plectropomus areolatus* in the Sudanese red sea coast.  
729 Terengganu University. 2012.
- 730 19. Spaet JLY, Berumen ML. Fish market surveys indicate unsustainable  
731 elasmobranch fisheries in the Saudi Arabian Red Sea. *Fisheries Research*.  
732 2015;161: 356–364. doi:10.1016/j.fishres.2014.08.022
- 733 20. Khalil MT, Bouwmeester J, Berumen ML. Spatial variation in coral reef fish  
734 and benthic communities in the central Saudi Arabian Red Sea. *PeerJ*. PeerJ  
735 Inc; 2017;5: e3410. doi:10.7717/peerj.3410

- 736 21. Trewavas E. Nomenclature of the Tilapias of southern Africa. *Journal of the*  
737 *Limnological Society of Southern Africa. Food and Agriculture Organisation*  
738 *of the United ...*; 2010;7: 42–42. doi:10.1080/03779688.1981.9632937
- 739 22. FAO. The Republic of Sudan. In: fao.org [Internet]. [cited 1 Oct 2017].  
740 Available: <http://www.fao.org/fishery/facp/SDN/en>
- 741 23. Tesfamichael D, Elawad AN. Sudan. *The Red Sea Ecosystem and Fisheries.*  
742 Dordrecht: Springer, Dordrecht; 2016. pp. 37–48. doi:10.1007/978-94-017-  
743 7435-2\_3
- 744 24. Olsen O, Wenneck W, Aasen A, Fadula F, Abdalla Nasir A, Habiballah H.  
745 First survey of renewable marine resources in the Red Sea State, Republic of  
746 Sudan 1 – 30 Nov 2012. 2015.
- 747 25. Froese R, Pauly D. *FishBase 2000 Concepts, design and data sources.* Froese  
748 R, Pauly D, editors. Los Banos, Laguna, Phillipines: ICLARM; 2000 p. 344.
- 749 26. Gabr MH, Mal AO. Trammel net fishing in Jeddah: species composition,  
750 relative importance, length-weight and length-girth relationships of major  
751 species. *International Journal of Fisheries and Aquatic Studies.* 2018;6: 305–  
752 313.
- 753 27. Lewis M, Jordan S, Chancy C, Harwell L, Goodman L, Quarles R. Summer  
754 Fish Community of the Coastal Northern Gulf of Mexico: Characterization of a  
755 Large-Scale Trawl Survey. *Transactions of the American Fisheries Society.*  
756 2007;136: 829–845. doi:10.1577/T06-077.1
- 757 28. Azarovitz TR. A brief historical review of the Woods Hole Laboratory trawl  
758 survey time series. *Canadian Special Publication of Fisheries and Aquatic*  
759 *Sciences.* 1981;58: 62–67.
- 760 29. Harley SJ, Myers RA, Dunn A. Is catch-per-unit-effort proportional to  
761 abundance? *Can J Fish Aquat Sci.* NRC Research Press Ottawa, Canada;  
762 2011;58: 1760–1772. doi:10.1139/f01-112
- 763 30. Stuart-Smith RD, Bates AE, Lefcheck JS, Duffy JE, Baker SC, Thomson RJ, et  
764 al. Integrating abundance and functional traits reveals new global hotspots of  
765 fish diversity. *Nature.* Nature Publishing Group; 2013;501: 539–542.  
766 doi:10.1038/nature12529
- 767 31. Stroemme T. NAN-SIS: software for fishery survey data logging and analysis:  
768 user's manual. *Computerized Information Series: Fisheries (FAO).* FAO; 1992.
- 769 32. Team RC. *R Language Definition.* 2000;: 1–60.
- 770 33. UNESCO. Nomination of Sanganeb Marine National Park And Dugonab  
771 Bay/Mukkawar Island Marine National Park (Sudan – Red Sea).  
772 whc.unesco.org. Khartoum; 2016 Jan p. 461.

- 773 34. Elamin, S.M. 2017. Final report on the first assessment and monitoring  
774 programme for *Plectropomus* spp. “Najil” in Dungonab National Marine Park.  
775 Faculty of Marine Science and Fisheries, Red Sea University, Port Sudan.  
776
- 777 35. Colton MA, Swearer SE. A comparison of two survey methods: differences  
778 between underwater visual census and baited remote underwater video. *Mar*  
779 *Ecol Prog Ser.* 2010;400: 19–36. doi:10.3354/meps08377
- 780 36. Emslie, M.J., Cheal, A.J., MacNeil, M.A., Miller, I.R., Sweatman, H.P.A.  
781 2018. Reef fish communities are spooked by scuba surveys and may take  
782 hours to recover. *PeerJ* 6:e4886; doi:10.7717/peerj.4886
- 783 37. Harvey, E.S., Newman, S.J., McLean, D.L., Cappel, M., Meeuwig, J.J.,  
784 Skepper, C.L. 2012. Comparison of the relative efficiencies of stereo-BRUVs  
785 and traps for sampling tropical continental shelf demersal fishes. *Fisheries*  
786 *Research* 125–126: 108-120 doi: 10.1016/j.fishres.2012.01.026

787 **7 Tables**

788 Table 1 Number of gear deployed (fishing stations) in the seven management areas, total fishing time in each management area for each survey, and  
 789 minimum, mean and maximum fishing depth for traps for each area and survey. Surveys were carried out in the coastal areas of Sudan in November 2012,  
 790 May 2013 and November 2013

| Survey    | Mgmt. Area | Number of stations (gears set) |           |          | Hours fishing |           |          | Fishing Depth |         |         |
|-----------|------------|--------------------------------|-----------|----------|---------------|-----------|----------|---------------|---------|---------|
|           |            | Traps                          | Handlines | Gillnets | Traps         | Handlines | Gillnets | Average       | Maximum | Minimum |
| Nov. 2012 | 1          | 22                             | 0         | 0        | 694           | 0         | 0        | 42            | 142     | 13      |
|           | 2          | 54                             | 3         | 3        | 722           | 78        | 62       | 41            | 71      | 0       |
|           | 3          | 26                             | 0         | 1        | 451           | 0         | 14       | 31            | 95      | 8       |
|           | 4          | 5                              | 0         | 0        | 77            | 0         | 0        | 23            | 54      | 10      |
|           | 5          | 31                             | 0         | 4        | 678           | 0         | 78       | 21            | 30      | 7       |
|           | 6          | 36                             | 0         | 1        | 850           | 0         | 38       | 32            | 88      | 0       |
|           | 7          | 31                             | 0         | 8        | 712           | 0         | 136      | 31            | 66      | 5       |
|           | Sum        | 205                            | 3         | 17       | 4184          | 78        | 328      |               |         |         |
| W.catch   | 109        | 3                              | 12        |          |               |           |          |               |         |         |
| May 2013  | 1          | 29                             | 0         | 1        | 420           | 0         | 24       | 31            | 70      | 5       |
|           | 2          | 81                             | 3         | 5        | 1102          | 378       | 222      | 27            | 145     | 5       |
|           | 3          | 32                             | 0         | 1        | 546           | 0         | 24       | 29            | 60      | 0       |
|           | 4          | 13                             | 0         | 10       | 160           | 0         | 138      | 30            | 67      | 9       |
|           | 5          | 33                             | 2         | 5        | 209           | 192       | 196      | 20            | 50      | 7       |
|           | 6          | 45                             | 1         | 2        | 642           | 156       | 78       | 35            | 88      | 9       |
|           | 7          | 39                             | 2         | 0        | 666           | 186       | 0        | 33            | 76      | 5       |
|           | Sum        | 272                            | 8         | 24       | 3746          | 912       | 681      |               |         |         |
| W.catch   | 141        | 8                              | 16        |          |               |           |          |               |         |         |
| Nov. 2013 | 1          | 23                             | 1         | 4        | 272           | 3         | 84       | 30            | 80      | 10      |
|           | 2          | 57                             | 2         | 6        | 500           | 111       | 156      | 38            | 80      | 7       |
|           | 3          | 9                              | 0         | 2        | 123           | 0         | 36       | 27            | 70      | 9       |
|           | 4          | 16                             | 2         | 4        | 151           | 5         | 143      | 33            | 68      | 12      |
|           | 5          | 30                             | 2         | 3        | 317           | 7         | 147      | 26            | 65      | 11      |
|           | 6          | 40                             | 4         | 2        | 444           | 32        | 72       | 40            | 89      | 6       |
|           | 7          | 22                             | 0         | 2        | 172           | 0         | 203      | 35            | 54      | 11      |
|           | Sum        | 197                            | 11        | 23       | 1979          | 157       | 841      |               |         |         |
| W.catch   | 62         | 9                              | 23        |          |               |           |          |               |         |         |

791



792

793

794 Table 2 Mean CPUE (kg per hours of fishing), mean trophic level and gregariousness

795 of traps and gillnets. Species density (no species in traps per hour of fishing) and the

796 functional group richness of trap catches (Rao's Q) for each of the seven management

797 areas along the Sudanese Red Sea Coast.

| Mgmt.<br>Area | CPUE (kg/hrs) |          | Trophic level |          | Gregariousness |          | Species<br>Density<br>(traps) | Rao's Q<br>(traps) |
|---------------|---------------|----------|---------------|----------|----------------|----------|-------------------------------|--------------------|
|               | Traps         | Gillnets | Traps         | Gillnets | Traps          | Gillnets |                               |                    |
| 1             | 0,12          | 1,64     | 3,83          | 3,93     | 1,51           | 2,41     | 1,07                          | 0,051              |
| 2             | 0,15          | 1,18     | 3,82          | 3,89     | 1,48           | 2,26     | 2,20                          | 0,079              |
| 3             | 0,14          | 0,31     | 3,84          | 4,14     | 1,55           | 2,50     | 1,44                          | 0,074              |
| 4             | 0,06          | 0,70     | 3,77          | 4,28     | 1,36           | 2,11     | 0,71                          | 0,048              |
| 5             | 0,08          | 0,73     | 3,80          | 3,85     | 1,63           | 2,18     | 1,12                          | 0,073              |
| 6             | 0,14          | 0,27     | 3,76          | 3,93     | 1,53           | 2,29     | 1,39                          | 0,048              |
| 7             | 0,10          | 0,68     | 3,83          | 3,61     | 1,57           | 1,90     | 1,45                          | 0,064              |

798

799

800

801

802 **8 Figure legends**

803

804 Figure 1. The Republic of the Sudan Red Sea coast, with coral reef areas

805 (aquamarine) and the names and spatial extent of seven fisheries management areas

806 (black polygons) shown.

807

808 Figure 2. Map showing all survey stations sampled from 2012 – 2013 overlaid the

809 seven fisheries management areas. PZU: the city of Port Sudan.

810

811 Figure 3. Violin plots of the depths at which traps were set during the three surveys

812 (Nov. 2012, May 2013 and Nov. 2013) in each of the seven management areas (see.

813 Figure 1). The width of the violins are scaled to the relative number of traps set at

814 each depth. Horizontal line in each violin plot marks the mean depth.

815

816 Figure 4. Total catches (kg) for the three fishing gear types: Gillnet (GN), Handline

817 (HL) and Traps (TB), for each of the three surveys (Nov. 2012, May 2013 and Nov.

818 2013 split according to: (A) main fish families, and (B) trophic group

819

820

821 Figure 5. Violin plots of catch rates (kg per hour fishing) for traps in each of the seven

822 management areas and each of the three surveys. The width of the plots are scaled to

823 the relative frequencies of catches with that catch rate.

824

825

826 Figure 6. Cumulative catch rates (kg per hour of fishing) of carnivores (Carni),  
827 corallivores (Coral.), herbivores (Herb.), invertivores (Invert.) and planktivorous  
828 (Plankt.) fish, per trap for each management area and survey by the trophic groups:  
829 carnivores, corallivores, herbivores, invertivores and planktivores.

830

831 Figure 7. Catch per unit effort (kg/hrs fishing) of carnivores (carni), corallivores  
832 (Coral.), herbivores (Herb.), invertivores (Invert.) and planktivorous (Plankt.) fish,  
833 versus depth for traps set during the three surveys (Nov. 2012, May 2013 and Nov.  
834 2013) in each of the seven management areas (see. Figure 1).

835

836 Figure 8. Catch per unit effort (kg per hour of fishing) versus trophic level for traps by  
837 each management area and survey, with the trophic groups: carnivores (Carni.),  
838 corallivores (Coral.), herbivores (Herb.), invertivores (Invert.) and planktivores  
839 (Plankt.) given different coloured symbols. Black vertical line shows the mean trophic  
840 level of the trap catches in each respective area and survey panel-plot.

841

842 Figure 9 Cumulative catch rates (kg per hour of fishing) per trap for each management  
843 area and survey by the species place in the water column: benthic, demersal, pelagic  
844 non-site attached, and pelagic site attached

845

846 Figure 10 Average species densities for each of the seven management areas (number  
847 of species in trap per hour of fishing), by the three surveys.

848

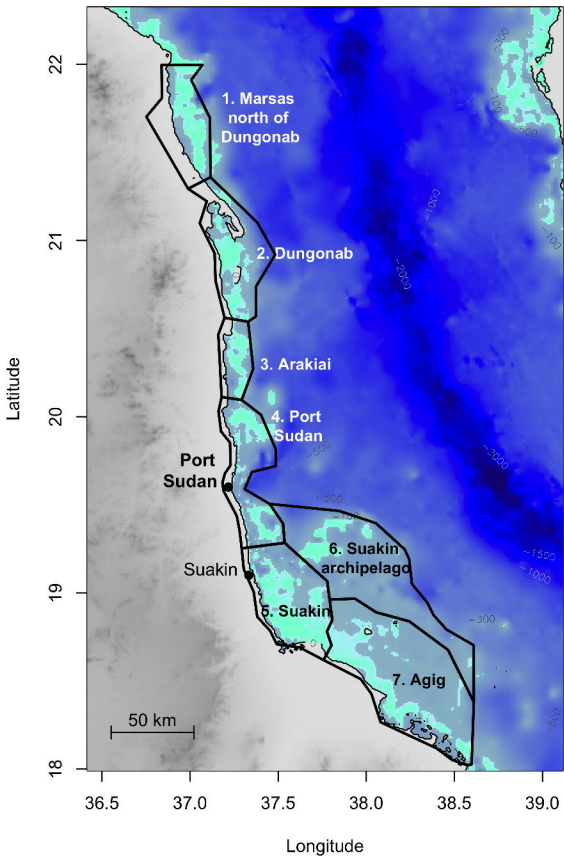

Survey 1: Nov. 2012

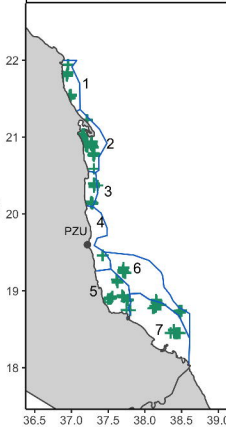

Survey 2: May 2013

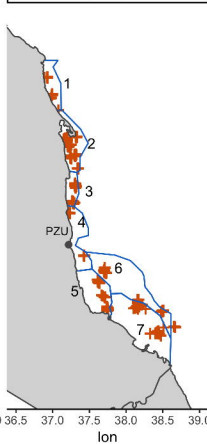

Survey 3: Nov. 2013

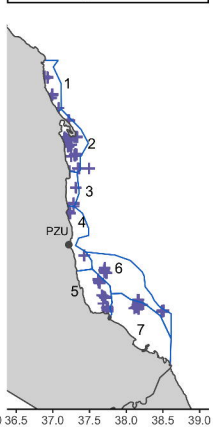

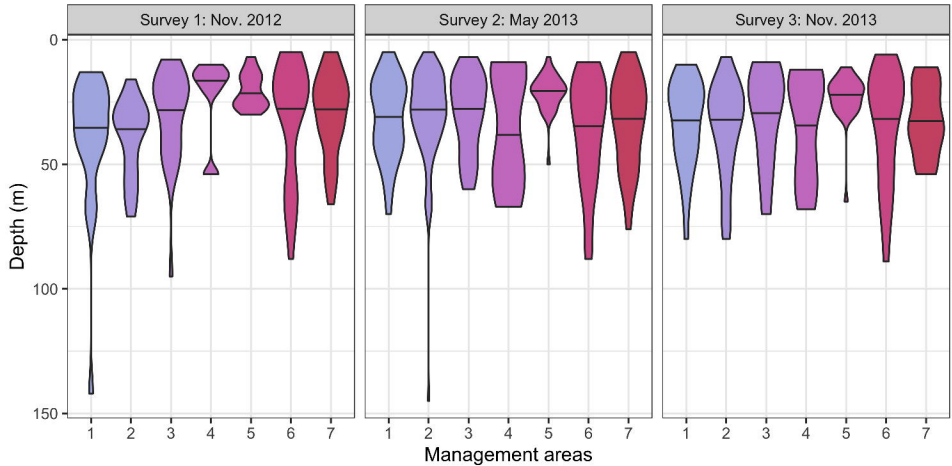

**A**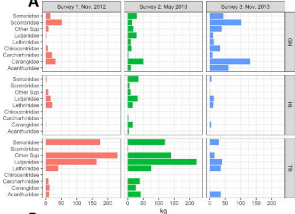**B**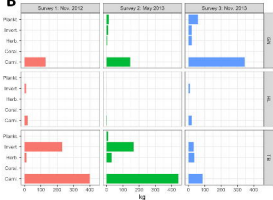

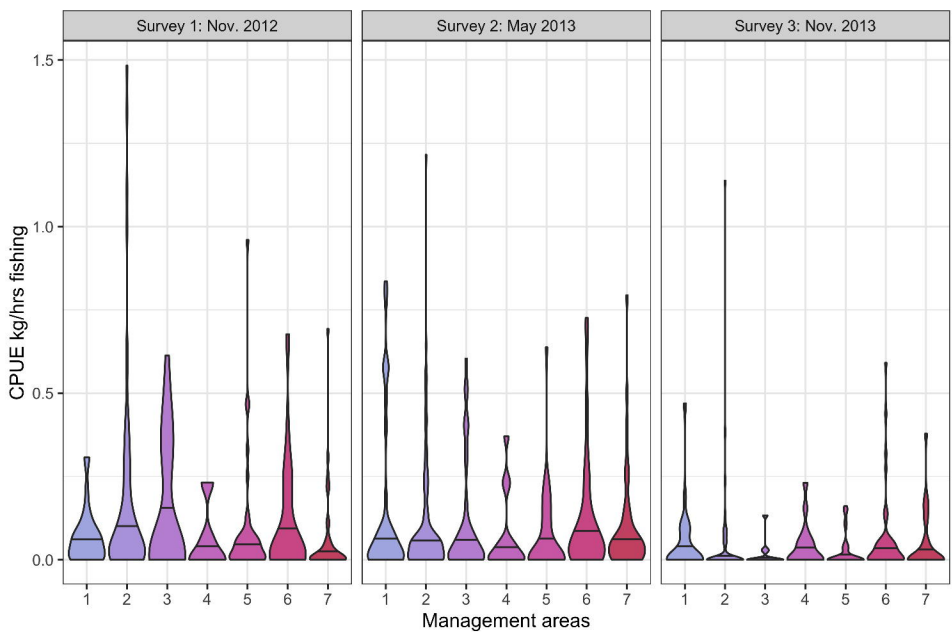



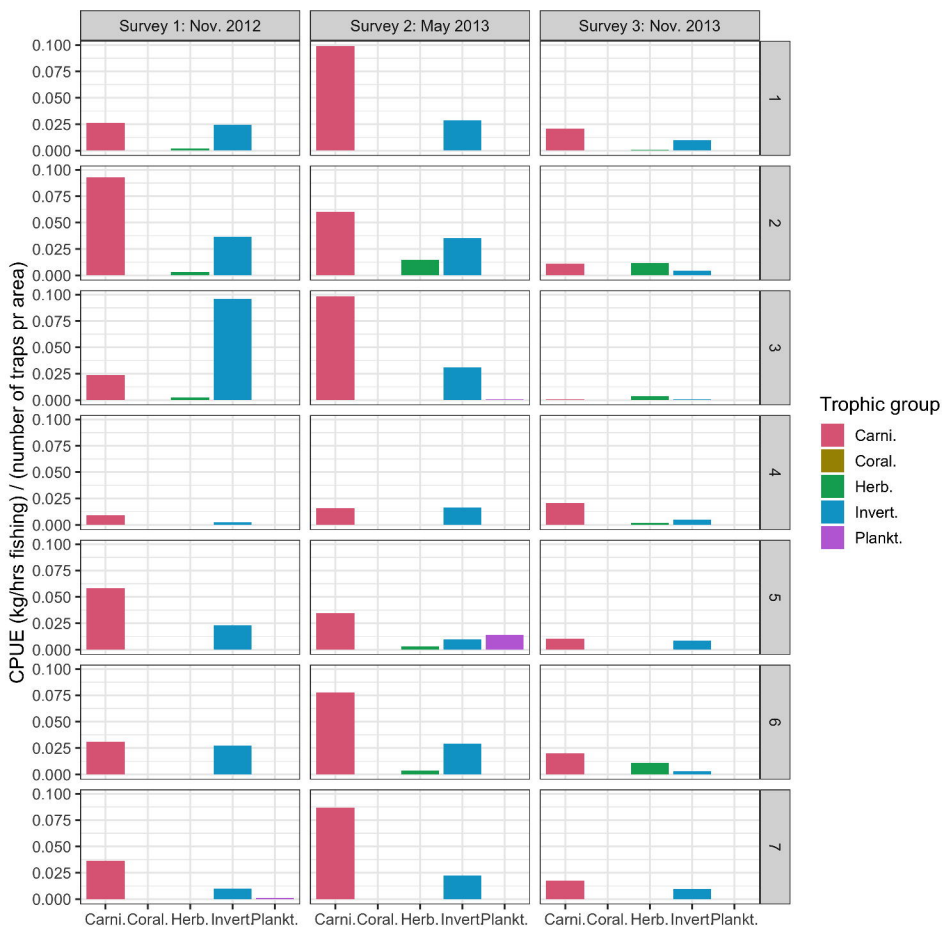

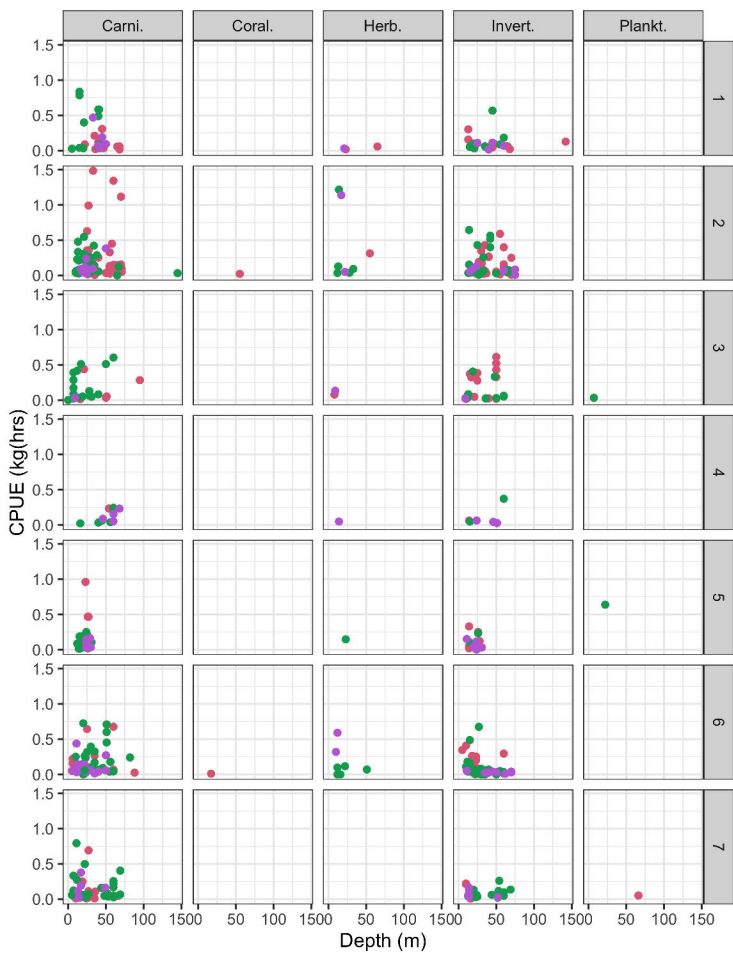

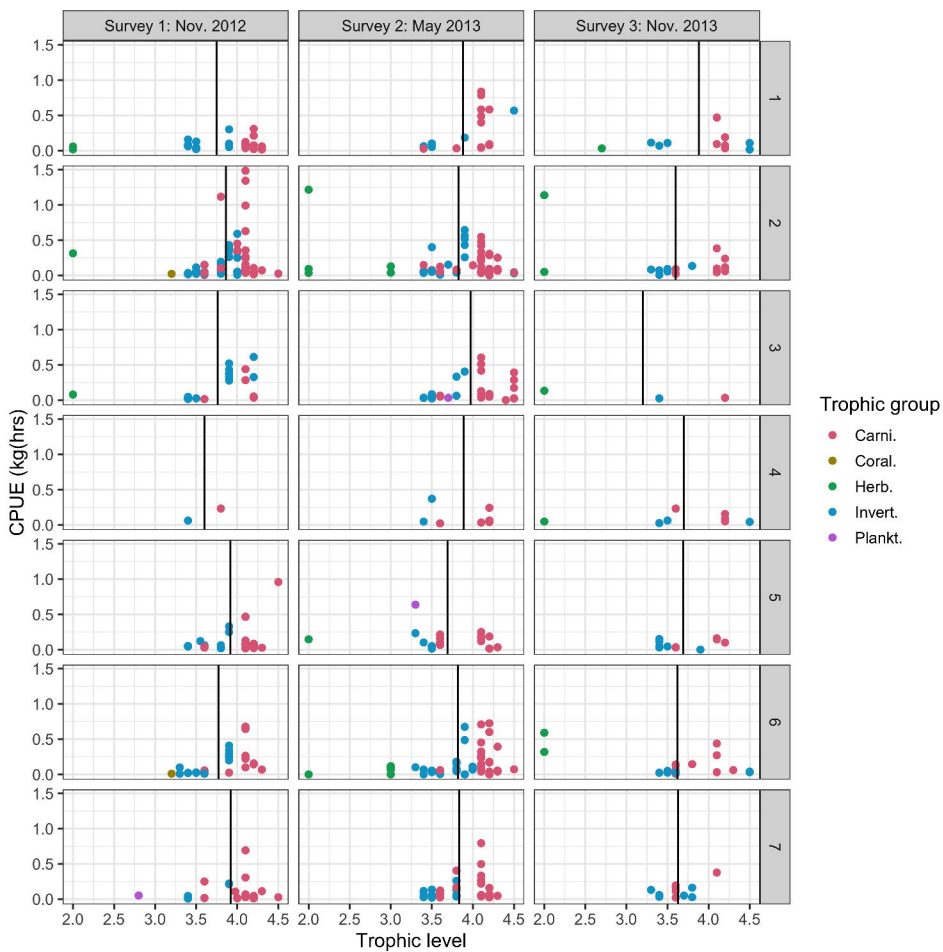

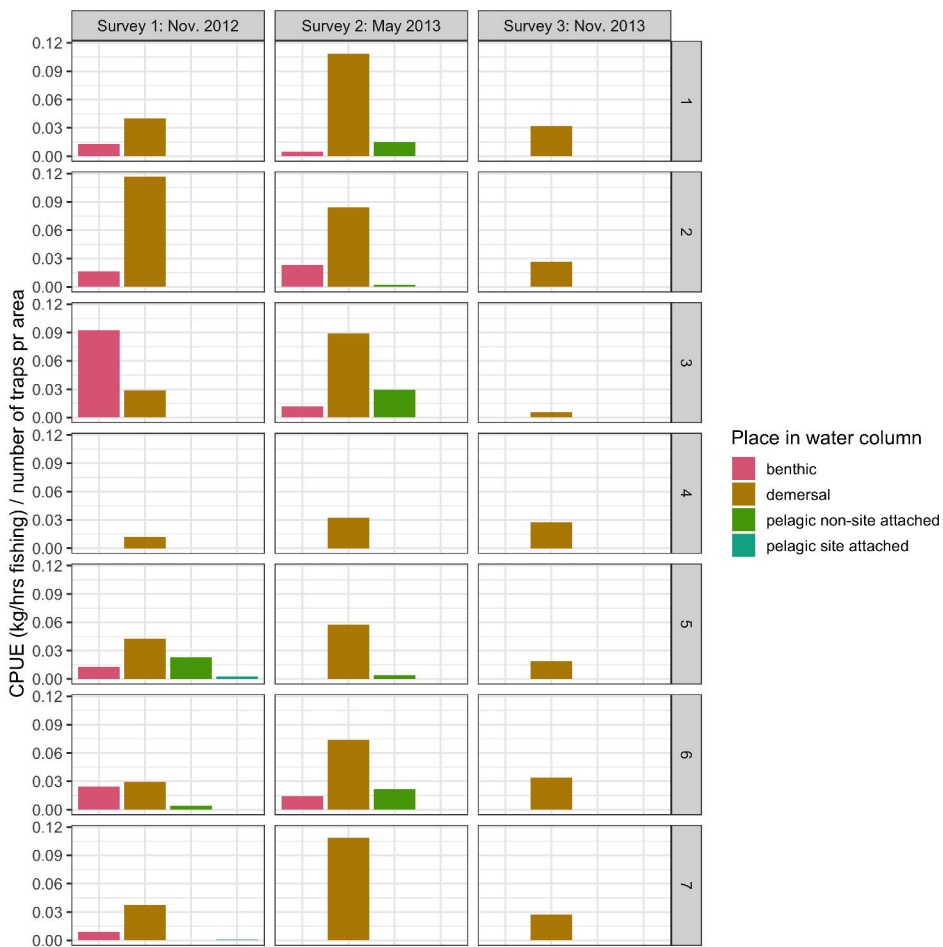

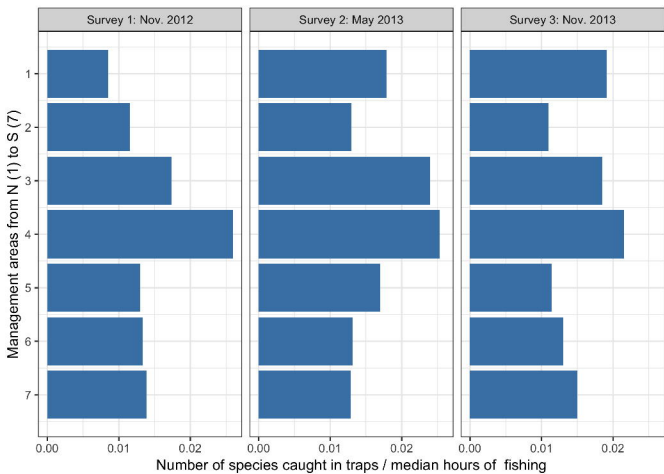

Source: https://www.biorxiv.org/content/10.1101/763961v1.full.pdf
